# Supplementary material for: Sociodemographic Heterogeneity in the Associations of Social Isolation With Mortality
Source: PubMed Central journal article supplement (PMC11127126; doi:10.1001/jamanetworkopen.2024.13132), 2024-05-24
Supplement: jamanetwopen-e2413132-s002.pdf [file jamanetwopen-e2413132-s002.pdf]

## Data Sharing Statement

Nakagomi. Sociodemographic Heterogeneity in the Associations of Social Isolation With Mortality. *JAMA Netw Open*. Published May 24, 2024.

doi:10.1001/jamanetworkopen.2024.13132

### Data

**Data available:** Yes

**Data types:** Deidentified participant data

**How to access data:** The dataset supporting the conclusions of this article is available upon reasonable request from the researchers admitted by the JAGES committee ([dataadmin.ml@jages.net](mailto:dataadmin.ml@jages.net)). All JAGES datasets have ethical or legal restrictions for public deposition because of the inclusion of sensitive information from human participants.

**When available:** With publication

### Supporting Documents

**Document types:** None

### Additional Information

**Who can access the data:** researchers whose proposed use of the data has been approved

**Types of analyses:** for a specified purpose

**Mechanisms of data availability:** after approval of a proposal
